# Supplementary material for: The Short-Term Effect of Interactive Drama and Reflective Writing on Adolescents’ Social-Emotional Learning Core Competencies: A Five-Week Intervention
Source: Research Square preprint supplement (doi:10.21203/rs.3.rs-4461803/v1), 2024-06-19
Supplement: Supplementary file 1 [file 88e2c648c58c4853f0bfa892.docx]

**Appendix A**

Questionnaire 1

Rate the following by describing yourself. 5 is the highest, while 1 is the lowest.

| **#** | **Questions** | **Evaluation** | | | |  |
| --- | --- | --- | --- | --- | --- | --- |
| **5** | **4** | **3** | **2** | **1** |
| 1 | Am I a good person? (kind, honest, just, loving, modest, noble, patient etc) |  |  |  |  |  |
| 2 | My behavior |  |  |  |  |  |
| 3 | My attitude towards my peers |  |  |  |  |  |
| 4 | My attitude towards my teachers |  |  |  |  |  |
| 5 | My attitude towards my parents |  |  |  |  |  |
| 6 | My ability to control my behavior and avoid conflicts |  |  |  |  |  |
| 7 | My ability to solve conflicts in a peaceful way |  |  |  |  |  |
| 8 | Am I a good citizen? (loyal, loving to work, helping others) |  |  |  |  |  |
| 9 | How do I care about nature and environment |  |  |  |  |  |
| 10 | My attitude towards my own health and others’ (health awareness) |  |  |  |  |  |
| 11 | My cultural level |  |  |  |  |  |

**Appendix B**

Reflective Writing Tasks

 Pre-intervention writing task:
*What do you think are the most serious problems people your age have?*

 Mid-intervention writing task 1: *What makes you angry? How do you react when people make you angry? Please give examples.*

 Mid-intervention writing task 2:

*1. Do you think you are getting angry faster or more slowly recently?*

*2. Do you think you are becoming kinder? How?*

*3. What is one think you can do to make the world a better place?*

*4. Write about a mistake you made that made you learn something.*

 Mid-intervention writing task 3:

*1. What do you think would improve the relationship between students at schools?*

*2. What do you think would improve the relationship between teachers and students at schools?*

*3. What would make you like going to school better?*

*4. What would make you hate going to school?*

 Mid-intervention writing task 4:

*Do you think our theatre activities helped you learn or feel something new?*

*If so, what is it?*

**Appendix C**

Questionnaire 2

**Social and Emotional Competencies Questionnaire (SEC-Q)©**

Read the following sentences and answer indicating to what degree you are in agreement with each one of them using the following scale:

1= Strongly disagree

2= Somewhat disagree

3= Neither agree nor disagree

4= Somewhat agree

5= Strongly agree

**1. I know how to label my emotions**

**2. I am aware of the thoughts that influence my emotions**

**3. I differentiate one emotion from another**

**4. I know how my emotions influence what I do**

**5. I know how to motivate myself**

**6. I have my goals clear**

**7. I pursue my objectives despite the difficulties**

**8. I know what people expect from others**

**9. I pay attention to the needs of others**

**10. I usually know how to help others who need that**

**11. I have good relationships with my classmates or workmates**

**12. I usually listen in an active way**

**13. I offer help to those who need me**

**14. I make decisions analyzing carefully possible consequences**

**15. I usually consider advantages and disadvantages of each option before I make decisions**

**16. I do not make decisions carelessly**

**Appendix D**

Playscript 1

Happy Hippo Show

**Das is Tunsch**

**By:** Shamil Fattakhov

**Topic:** Ethnic prejudice

**Message:** *Judging people on the basis of ethnic origin is hurtful.*

**Characters: Monika** (16) and **Tunsch** (17), **Marcus**

**Setting:** Living room

*Monika and Tunsch are in the living room and Turkish music is playing.*

**Mon:**  Some more tea?

**Tun:** Yes, thank you. You make a very good tea, just like my grandma. She’s the tea expert in our home.

**Mon**: Your grandma lives with you? My grandma is in a home for the elderly. You know, Tunsch, I like it that you’re so close to your family. It’s not like that in our family…

**Tun**: What does your brother do?

**Mon**: He’s an architect, or at least plans to be. He’s a university student. By the way, that’s one of his recent designs… A global house

**Tun**: Looks great. *(Carefully picks up the model to look at it).*

*Marcus enters.*

**Mon:** Well, here he is! Hi, Marcus! I’d like you to meet Tunsch.

**Tun:** Good evening, Marcus.

# **Marcus:** What’s he doing with my model?

**Mon:** I was just telling Tunsch about your work.

*Tunsch puts it back on the shelf and it drops to the floor.*

**Tun:** I’m so sorry!

# **Marcus**: What do you think you’re doing, you stupid foreigner?

**Mon**: Marcus!

**Marcus**: So, what’s your problem? You bring this extra-terrestrial to our house and he destroys everything!

**Mon**: Stop it!

**Marcus**: You know our father doesn’t like these stupid people!

**Mon**: Marcus, how can you say such a thing?!

**Marcus**: How can I say this? Easy! Because I speak straight from the heart. These foreigners are everywhere. They take over our restaurants, our factories, our taxis, and now they’re penetrating into our houses and bringing their music with them. And I don’t like it! Genug!

**Mon**: Marcus! You should be ashamed for such words!

**Marcus**: I mean every one of them!

**Mon**: You are nothing more than a stupid little boy!

**Marcus**: What?! Get out of here with your dirty foreigner! This is my house and I won’t tolerate your foreigners here!

**Mon**: This is my house too!

**Marcus**: Sure, and you can come back…..alone!

**Mon**: Marcus!

Approaches him and lifts her hand to slap him.

**FREEZE—DISCUSSION—UNFREEZE!!!**

**Tun**: Monika! He’s right. I must go. Nobody can demand hospitality, it must come from the heart.

**Mon**: Tunsch, I just don’t know what to say—how to express my shock and regret at how you’ve been treated here.

**Tun**: By the way, Marcus, there’s a structural error in your model of the global house. Le Corbusier wrote about it in 1928. You might want to check it out.

**Marcus**: Huh…?

**—The End—**

**Appendix E**

Playscript 2

Happy Hippo Show

# ***Colours***

**By:** Lau Chee Loong/ Mr. Kang Eng Soo

**Topic:** The Oneness of Humankind

**Message:** *The well-being of mankind, its peace and security, are unattainable unless and until its unity is firmly established.*

**Characters:** Yong *(Yellow*), Peter *(Purple*), Gary *(Green)*, Ben *(Blue)*, Mr. White *(shop owner)* and some customers *(no dialogue)*. *Each character identified above by Coloured glasses of his Colour and clothes of the same Colour.*

**Setting:** *Mr. White's ice-cream house. Four friends are sitting chatting at a table. Other customers at another table.*

**Ben:** What a surprise! 90% of what we predicted came out in the exams!

**Gary:** Not a big deal, right?

**Yong:** Yeah, we do it most of the time...

**Gary:** Especially those that are predicted by Peter.

**Peter:** Come on... it's simply logic.

**Ben:** After all, Peter's the smartest among us.

*Mr. White is serving other customers on the other table.*

**Yong:** *(To Mr. White)* Excuse me, Sir, could we order now?

**White:** Alright! What kind of ice-cream would you all like?

**Yong, Peter, Gary &** **Ben:** *(in chorus)* Vanilla!

**White:** No problem!

*Mr. White exits*

**Gary:** Kind of hot, today...

**Ben:** It's summer time...

*Yong's fanning himself with a magazine and Peter grabs it from him and browses through it.*

*Mr. White comes with the ice-cream*

**White:** Here you are! Four bowls of vanilla ice-cream!

*The boys help themselves.*

**Ben:** This is the most delicious vanilla ice-cream I have ever had!

**Gary:** Ya...look at its Colour, as green as the leaves and grass... it makes you feel fresh just looking at it!

*Yong and Peter laugh and Ben looks puzzled.*

**Yong:** Ha... you’re Colour-blind, aren’t you?

**Peter:** Anyone with a bit of intelligence can tell that it is purple!

**Yong:** Yellow! *(Says at the same time as Peter)*

*Yong and Peter look at each other.*

**Peter:** I can't believe this. Come on guys. It's purple.

**Yong:** Wait a minute. What makes you so sure? Obviously, it's yellow! What do you think Ben?

**Peter:** Yes... Ben! Say something intelligent, purple or yellow?

**Ben:** Calm down guys. I don't think we should argue about this... even though it IS blue...

**Gary:** It's a mistake... blue and green look almost the same. You must have mistaken green as blue.

**Yong:** I don't get it. Even my poor nanny knows vanilla is yellow. Why can't you guys?

**Gary:** No, no, no *(In a mimicking tone)* MyDADDY says it's green**—**so it is!

**Ben:** Come on friends. We've been able to agree on everything so far. But why are we arguing over ice-cream?

**Peter:** Listen all you silly, dumb colour-blind people! Yellow!... *(Pointing at Yong)* Green! *(Pointing at Gary)* Blue! *(Pointing at Ben)* What kind of nonsense is this? Why can't you all listen to the smartest? When I say it's purple, it's purple. That's final! I can't imagine I've actually hung around with a bunch of dummies for all these years.

**Yong & Gary:** What?!! Dummies?!!

**Yong:** Who do you think you are?

*Ben looks disappointed and covers his ears.*

**FREEZE—DISCUSSION—UNFREEZE!!!**

*Mr. White rushes to stop the argument.*

**White:** Calm down young men! What seems to be the problem here?

*Yong, Peter and Gary****—****all cross their arms and look into different directions.*

**Ben:** It's all because you've served FOUR different colours of vanilla ice cream. That's why…

**White:** What different colours?

*Mr. White looks at the boys, realizes the problem and he laughs.*

**White:** Ha… poor fellows. My vanilla ice-cream is always as white as snow... ha... can't any of you see that?

*Yong, Gary and Peter look at Mr. White in disbelief.*

**Peter:** What?

**Yong & Gary:** White?

**White:** You all have come from different cultures. Each one of you has been taught differently by your forefathers. The truth can be revealed to you only if and when you get rid of your glasses of prejudices.

**Ben:** But... these glasses are our traditions...

**Gary:** Our beliefs!

**Yong:** Our culture!

**Peter:** Our life...

**White:** Be brave and face the truth... It's your choice!

The boys hold their glasses**—**a pause**—**slowly they take them off and are shocked by the actual colour of the vanilla. Mr. White leaves them and goes back to his place.

**Ben:** Wow!

**Yong:** Can you see what I see?

**Gary:** Ah... white... they’re all the SAME...

**Peter:** What the same?!! Mine has no red cherry on top of it.

Ben takes a scoop of Peter's vanilla and puts the spoon in his mouth saying...

**Ben:** Stop looking at the differences Pete... It's the taste that counts!

**Yong &** **Gary:** Ha...

*Peter takes the spoon, looks at it and they all laugh together.*

**—The End—**

**Appendix F**

Playscript 3

The New Girl

**By:** [Diliana@Dolly](mailto:Diliana@Dolly) James

**Topic:** Class prejudice

**Message:** *We should overcome our prejudices against those from different backgrounds, be sensitive to their feelings and needs, and not make assumptions about them.*

**Characters:** Lela, Moni, Erin

**Setting:** In school

*Lela and Moni are best friends and go to the same school.*

**Lela:** Moni, let’s go to the canteen! I am starving!

**Moni:** Good idea! I am starving too.

On the way to the canteen they see a new girl from the village, who has just entered their class.

**Moni:** Look, there’s that new girl, Erin. She looks a bit lonely, let’s invite her to go with us.

**Lela:** Eh, no need-lah, she’s so ugly, and look at her clothes—what would everyone say, us hanging out with a villager?

**Moni:** Come on, Lela, how would you feel if you were a villager and came to a new school in town? Wouldn’t you like someone to show you kindness? Okay-lah? Let’s talk to her!

**Lela:** Eh, Moni, I don’t need you to tell me how to feel and what friends to keep. If you want to be seen with that village kid, then go! But, you won’t go with me! She probably doesn’t even have enough money to eat—and you’ll have to pay for her!

**Moni:** Lela, I didn’t mean to sound like I was telling you what to do. I just thought we should try to be kind. You are always so hasty, Lela, getting angry and running off before talking things over!

**Lela:** *(Interrupting impatiently)* I don’t need to talk anything over to understand that you prefer that village trash to me! So go eat with her—there are plenty of other people I can eat with! *(Walks off angrily)*

**FREEZE—DISCUSSION—UNFREEZE!!!**

**Moni:** Lela, I didn’t mean to sound like I was telling you what to do. I just thought we should try to be kind. You are always so hasty, Lela, getting angry and running off before talking things over!

**Lela:** *(Interrupting impatiently)* I don’t need to talk anything over to understand that you prefer that village trash to me! So go eat with her—there are plenty of other people I can eat with! *(Walks off angrily)*

Moni looks at Lela sadly as she walks away, and then slowly approaches the village classmate, Erin.

**Moni:** Hi, Erin! Have you had lunch yet? Would you like to go to the canteen with me?

**Erin:** *(Looks up in surprise, and then smiles shyly)* No, not yet. Do you really want to go with me?

**Moni:** Sure, why not? Let’s go. Have you been to our canteen yet?

**Erin:** No, not yet, this will be my first time. Thank you, Moni, it’s very kind of you.

Moni and Erin go to the canteen and there they see Lela with another friend, standing in line to buy food, they join the line behind her. Lela ignores them. When she moves forward to order her food, Erin speaks quietly to Moni.

**Erin:** *(In a bit of a whisper)* Moni, I thought Lela was your good friend, I always see you together—why doesn’t she greet you?

**Moni:** *(Sadly, but trying not to show it)* Oh, just a little misunder­standing—it’ll pass…

Lela starts to look in her purse for money—then she looks more frantically, not finding it.

**Lela:** *(To her friend, but a bit loudly in her distress)* Oh no! I think I left my lunch money at home!

Erin seems to think for a second, then shy and hesitatingly steps forward.

**Erin:** If you’ve forgotten your money, I… I… have a little I can lend you for today… *(She offers some money)*

**Lela:** *(Looking at her first with surprise, and then with an embarrassed smile)* Uh, well, thanks… that’s really very nice of you… *(Takes the money, slowly, and then turns and orders her food)*

Moni and Erin also order and get their food, and then together go and sit down at the same table as Lela. After they have sat down, Moni looks at Erin’s tray—there is only a small bun on it.

**Moni:** Erin, you didn’t buy much—aren’t you going to be hungry?

**Erin:** *(A little embarrassed)* Oh, no, this is just fine… I’m not very hungry today…

It is clear to both Moni and Lela that Erin has sacrificed her own lunch in order to lend money to Lela. Moni looks down, and Lela looks at Erin more closely, with new eyes, with new appreciation, and then slowly starts to eat.

**Moni:** Erin, Lela and I are going to study at the library tonight—maybe you’d like to come along with us…?

**Erin:** (Beaming with pleasure) Yes, that would be very nice. (Pause) You know, I was feeling kind of down before this, missing home, and wondering if I would ever make new friends here. But after just a few minutes with you, I feel much more at home. I think you two must be the nicest girls in the school!

**Lela:** Well, I think Moni’s the one who wins the prize in “niceness”…

Moni and Lela look at each other with a smile.

**—The End—**

**Appendix G**

Playscript 4

***A New Leaf***

**By:** Lua Shaheed

**Topic:** Bullying

**Message:** *Bullies may think they look tough, but few people really respect them and fewer really like them. Bullying is really a sign of weakness.*

**Characters: Ravi:** about 14; **Arjun:** about 11; **Punam,** Ravi’s little sister, about 11; **Sanjog:** about 14

**Setting:** School yard

*Arjun is sitting in the school yard and starts to take a sandwich from his lunch box, when Ravi approaches.*

**Ravi:** Hey, what are YOU doing here, little boy?

**Arjun:** Oh, I’m just having my sandwich.

**Ravi:** Oh, is that SO?

**Arjun:** Yes.

**Ravi:** Well, little boy, or should I say, little baby, I’m older than you, so you have to give me your sandwich, whether you like it or not!!

**Arjun:** Hey, that’s not fair!

**Ravi:** *(Imitating sarcastically)* “That’s not fair!” Hey, little boy, nothing’s fair in this world!

*He tries to pull Arjun’s sandwich out of his hands, and by mistake the sandwich falls into a puddle of water.*

**FREEZE—DISCUSSION—UNFREEZE!!!**

**Ravi:** Well, little boy, or should I say, little baby, I’m older than you, so you have to give me your sandwich, whether you like it or not!!

**Arjun:** Hey, that’s not fair!

**Ravi:** *(Imitating sarcastically)* “That’s not fair!” Hey, little boy, nothing’s fair in this world!

*He tries to pull Arjun’s sandwich out of his hands, and by mistake the sandwich falls into a puddle of water.* *When he looks to see where the sandwich has landed he sees Punam, his little sister, a few meters away, who is crying and handing her apple to another big boy, Sanjog who seems to be demanding it. Ravi runs to his sister’s side.*

**Ravi:** *(To Sanjog)* Hey, Sanjog! What do you think you’re doing, picking on a little girl?

**Sanjog:** *(Bewildered)* What does it look like I’m doing? Exactly what you taught me…

**Ravi:** But that’s my SISTER!

**Punam:** Oh, go away, Ravi! I saw what you did to Arjun *(points),* and he’s MY CLASSMATE! I’m ashamed.

**Ravi:** *(To Sanjog)* Give her back the apple.

*Sanjog tries to give it back.*

**Punam:** No, if you’re so hungry, keep it. I think you must be very poor to need it so much. *(Stands)* And I think you can’t be very smart, if you imitate my brother—and if the only way you can get something is to pick on little kids. *(Goes to Arjun)* Come on, Arjun. I have a sandwich and we can share it. And every time someone takes your sandwich, you can come and take mine.

*Punam and Arjun walk away together, and Ravi and Sanjog stand in silence for a moment, both looking at them.*

**Sanjog:** So, that’s your sister, huh?

**Ravi:** Yeah…*(Looks up suddenly at Sanjog and grabs the apple out of his hand)* And if you bother her again, you die!

**Sanjog:** Okay, okay, I get the message. *(Pause)* …Maybe we shouldn’t bother anyone… I mean, I don’t want anyone thinking I’m poor…

**Ravi:** Yeah… *(Thoughtfully takes a bite out of the apple)* Or stupid… *(Pause, gets an idea)* And you’re not poor, right?

**Sanjog:** Nah!

**Ravi:** Good! Then let’s go buy some sandwiches… I’m hungry!

**Sanjog:** Hey, you blow all your money on video games, and I have to pay for your sandwich?

**Ravi:** Come on, I’m taking your suggestion and turning over a new leaf—encourage me!

**Sanjog:** Geesh! Okay, but tomorrow you buy mine! You could get money every day if you’d just help out old Raj in his shop.

**Ravi:** *(Sighs sadly)* Yeah… Looks like I’ll have to work for my living… Tough.

**Appendix H**

Playscript 5

Happy Hippo Show

Bruise

**By:** Shamil Fattakhov/Ian Reed

**Topic:** Fighting

**Message:** *Strength of character is more impressive than brawn****.***

**Characters:** Stephanie, Sam, John (all 17-18)

**Setting:** Park Bench

*Stephanie and Sam are sitting on a park bench, when John approaches with a black eye.*

**Steph:** Look who's coming!

John, what's wrong with your eye?

**Sam:** Mm, hm, hm, I don't believe my eyes! Straight A-student, pride and joy of his parents, school hero, descendant of 48 generations of noblemen, and he's got a vulgar, terrifying black eye!

**Steph:** How'd you get the bruise?

**John:** Don't worry about it.

**Sam:** Wait a minute! Yesterday you were at Carl's birthday party! What happened?

**John:** Well... something happened.

**Steph:** We'll give you a massage, put an ice pack on your face, and in a week you'll look like a shiny new penny!

**Sam:** Okay, don't worry about it—all over the planet, millions before you, and millions today walk around with big bruises.

**Steph:** Hey John, please tell us what happened

**John:** What do you want me to say? We were sitting, we were talking, we were dancing. I danced with Kathy.

**Steph:** Kathy... captain of the cheer leading team?

**John:** No, different Kathy, she plays soccer.

**Sam:** *(Joking)* And what? She kicked you in the eye?

**Steph:** C'mon Sam, stop teasing him. So what happened?

**John:** So we were leaving the party, there were these three guys and... you know…

**Steph:** And she?

**John:** What about her? She watched! Afterwards, she conveyed her condolences.

**Steph:** And did you drive her home?

**John:** Yes I did but...

**Sam:** Oh, I understand. She didn't express her hot wish to meet again, right?

**John:** Well, right.

**Sam:** You know what I think guys? There is only one solution to this problem! We have to have strong muscles, we have to have strong iron fists, nobody can survive nowadays without strength!

**Steph:** Oh, give me a break Sam! The time for physical strength to rule our lives went out of style. Important things like intellect, intuition--that's what's leading mankind today!

**Sam:** Not at all, all these things are great ideas and all, but life is becoming too dangerous. I mean, it's like we live in a jungle! Each day, each second, we have to be ready to show our teeth and fight back!

**Steph:** Why?

**Sam:** So that they fear you, and then you get respect!

**John:** What about friends?

**Sam:** What friends? Friends will turn on you just like anybody else!

**John:** Wait a second! Does that mean that if I get in your way you'll try to destroy me?

**Sam:** Why not? Of course I will!

**John:** Then you should know that I'm against you! I'm against violence! You wanna hit me? Go ahead and hit me! You go ahead! Just try it!

**Sam:** Okay, sure, I will!

Sam moves towards John to hit him.

**FREEZE—DISCUSSION—UNFREEZE!!!**

Sam moves towards John to hit him. But Stephanie stands in between them.

**Steph:** Stop it!

**Steph:** *(To Sam)* Sam, please understand—what you're saying is very dangerous. Look at yourself! You could easily turn into a fighting machine! And then you'll be fighting right and left, because violence is so easy to get sucked into.

**John:** Okay guys, this is what I'm going to do. I will treat my black eye and I won't fight back. And after that...

**Steph:** What?

**Sam:** Yeah...?

**John:** I'll tell them that I'm not angry with them. I’ll go to the teacher and ask him to talk to them and say, “You're clever guys, and you understand that love and respect can not be gained by violence.”

**Steph:** Hey, that's not bad... I bet nobody has told them THAT before in their lives! This will work, I'm sure! This is much different! I guess we're finally living in the 21st century!

**Sam:**

**Sam:** And I’ve got just the stuff to do it at my house—you’ll be looking like a shinny penny in no time!

*They move off together.*

**—The End—**

**Appendix I**

Playscript 6

Happy Hippo Show

Nothing Like Us

**By:** Cross Class 311

**Topic:** Racisim

**Characters:** Sarah (mother), Anna (both black-skinned);
Lilly (mother), Jack (both white Caucasian).
Both children are about six years old.

**Setting:** City Park

*Sarah and Anna are walking in the park.*

**Anna:** Mom, Mom, look! There's a kite there! So high! Mom, Daddy told me he will buy me a kite too.

**Sarah:** Really? Then we will try it out next Sunday together, OK?

**Anna:** Great, Mom!

*They sit on a bench*. *Lilly and Jack sit on a bench not far from theirs.*

**Lilly:** Look, Jack, there are two foreigners, and that little girl is so lovely, why don't you go play with her for a while?

**Jack:** No, she's black!

**Lilly:** Jack! How could you say that! She has a beautiful skin!

**Jack:** I don't want to play with a black girl!

**Lilly:** But why?

**Jack:** Because Johnny and Bob say black people are bad—they’re poor and dirty!

**Lilly:** But dear, you can’t believe everything you hear. Now look, we’ve seen this girl and her mom before—they live in our apartment building. They dress just as nicely as you do, they live in an apartment just like ours, and they aren’t dirty at all! So, you can see yourself that Johnny and Bob are wrong. Now, go play with the girl; I’m sure you’ll have fun!

**Jack:** No! Don’t want to!

**Lilly:** Well, then dear, I guess you’ll play alone, won’t you?

**FREEZE—DISCUSSION—UNFREEZE!!!**

*Jack moves further off and plays with two toy trucks in the sand. After a moment, Lilly picks up Jack’s ball and goes to sit with Sarah and Anna.*

**Lilly:** Hi, my name’s Lilly. I think you live in the same apartment building we do.

**Sarah:** Yes, I think we do. I'm Sarah and this is my daughter, Anna. We moved in about a month ago.

**Lilly:** Yes, I thought you were new. We’ve lived here for years. So, if you need to know anything about the area, just ask.

**Sarah:** Thanks, that’s nice to know!

*Then Lilly looks at Anna.*

**Lilly:** Hey Anna, do you want to play ball?

**Anna:** Sure!

**Lilly:** Why don’t you join us, Sarah—we’ll play dodge ball. I’ll be in the center first!

**Anna:** Is that your little boy? Does he want to play too?

**Lilly:** If we start having fun, I think he’ll come on his own… *(Winks at Sarah, and Sarah smiles understandingly)*

*Lilly, Anna and Sarah start playing dodge ball, and are soon laughing and having a lot of fun. Jack pretends to be uninterested and continues playing with this trucks, but he’s watching them out of the corner of his eye with envy. Then the ball falls near him. He picks it up and starts to throw it back.*

**Anna:** You can play with us if you want. Do you know how to play?

**Jack:** Of course I do! *(Hesitates a moment)* Oh, all right…

*Soon he’s playing with them and having fun. After a while the ladies get tired and sit down, leaving the children alone together.*

**Anna:** Do you collect baseball cards?

**Jack:** *(Surprised)* Yeah, do YOU?

**Anna:** Of course! I have about 300.

**Jack:** *(More surprised)* But… you’re a girl!

**Anna:** So, what difference does that make?

**Jack:** Er, nothing, I guess… *(Pause)* Do you have any cards you want to trade?

**Anna:** Sure, I have a whole stack that I’d like to trade off. Do you?

**Jack:** Yeah!

**Lilly:** *(Calling to Jack)* Jack! It’s about time to go now. We’ve got to pick up your sister.

**Jack:** *(Disappointed)* Aw Mom...! *(To Anna)* Will you come here tomorrow?

**Anna:** If Mom has time…

**Jack:** And can you bring your cards?

**Anna:** Sure, I’ll bring them and we can trade.

*Lilly stands and motions to Jack, who joins her and they walk away.*

**Lilly:** *(A bit amused)* So, Jack. Did you have a good time?

**Jack:** *(Nonchalant)* Guess so.

**Lilly:** Did… uh… you learn anything?

**Jack:** *(More enthusiastic)* Yeah!

**Lilly:** *(Pleased)* Oh? WHAT did you learn?

**Jack:** That black people aren’t ANYTHING like us!

**Lilly:** *(Disappointed and dismayed)* Jack! You had such a good time! How can you say that?!

**Jack:** Come ON, Mom. Just look at Sis—all she wants to do is play with her dolls! But BLACK girls have much more sense. THEY collect baseball cards! *(Pauses a moment, perplexed)* But Mom, if black girls play ball and collect baseball cards, what do you think black BOYS do?

**Appendix J**

Playscript 7

Arno and Arameh are on the stage **fighting** in one classroom

**Arno.** Stop, stupid boy!

**Arameh.** I won’t stop until you stop, idiot.

Anahit, the teacher, enters the classroom and starts **fighting** with them

**Anahit**. Stop you idiots! You are stupid and everything in this class is bad. I am so ashamed of you!

**Arameh.** Everyone here is bad. I hate you all!

**Arno**. I can’t wait until I leave this stupid place! Everything is terrible!

**Anahit**. Go! I don’t care about any of you, stupid students

They all pause and try to listen to what is happening in the next classroom

**Anahit**. Can you hear that, you idiots?

**Arameh.** Shut up, Arno, I can’t hear anything, you stupid!

**Arno**. Shut uuuuuuuup, Arameh, let me listen!

Mane and Hasmik are sitting and talking quietly with their teacher Nellie

**Nellie.** You did a great job, you two. I know it is a bit difficult, but you could do it very nicely.

**Mane.** Thank you so much, it is because of the great work my friend Hasmik helped me with.

**Hasmik.** That’s so nice of you. You also did a great job and helped me a lot.

Anahit, Arameh, and Arno enter and start making fun of the other class

**Anahit**. What a boring class and a boring teacher, is that how you spend the whole day?

**Arameh.** Booooooooring and stupid, hahahahah.

**Arno**. Boring, boring, boring. Stupid, stupid, stupid. Arameh, you’re boring and stupid too

They fight and Anahit also fights with them

40 years later, Mane is at a café

Mane enters and sits with her

**Mane.** Hasmik, hi! I am very happy to see you!

**Hasmik.** You look good! How is life going?

**Mane.** I am doing great. We are now organizing an event to help children in war zones. We have helped

now 40 000 children and build 2000 houses. How about you and your work with the farm?

**Mane.** That’s amazing. I heard about the great things you are doing for our country, there are less and

less poor people now. I am fine. We are planting 10 new types of fruit and vegetables all over the country. The country is becoming so rich in natural resources and many tourists are coming.

**Hasmik.** Right, our country is now one of the most developed and there are no wars. Oh, have you seen

Our teacher Nellie’s new video? Let’s watch it now.

Nellie in the video

**Nellie. (with a lot of energy)** Thank you so much for all what you did. Now we have 7 billion views! All the money I got from my new song is now sent to build schools in our country. Please like and subscribe

Hasmik and Mane are clapping and happy for her

They leave the café

Outside the café, Arno and Arameh are fighting

**Arno.** Stop, stupid boy!

**Arameh.** I won’t stop until you stop, idiot.

Anahit comes

**Anahit**. Stop you idiots! You are stupid and everything in this country is bad. I am so ashamed of you.

**Arameh.** Everyone here is bad. I hate you all.

**Arno**. I can’t wait until I leave this stupid place! Everything is terrible!

**Anahit**. Go! I don’t care about any of you, stupid people

They fight and Anahit also fights with them
